# Supplementary material
Source: MDPI journal article supplement (https://www.mdpi.com/2225-1154/10/12/195)
Supplement: s1 [file s1]

## Supplementary Material

**Table S1.** Stations on the Northern Hemisphere [34].

| No. | Station        | Lat. (° ' ) |    |   | Lon. (° ' ) |    |   | Height (m) |
|-----|----------------|-------------|----|---|-------------|----|---|------------|
| 01  | Ostrov Dikson  | 73          | 30 | N | 80          | 24 | E | 47         |
| 02  | Barrow         | 71          | 17 | N | 156         | 47 | W | 12         |
| 03  | Reykjavik      | 64          | 08 | N | 21          | 54 | W | 54         |
| 04  | Anchor age     | 61          | 09 | N | 149         | 59 | W | 52         |
| 05  | Helsinki       | 60          | 19 | N | 24          | 58 | E | 51         |
| 06  | Oslo           | 60          | 12 | N | 11          | 04 | E | 202        |
| 07  | St. Petersburg | 59          | 58 | N | 30          | 18 | E | 6          |
| 08  | Stockholm      | 59          | 21 | N | 17          | 53 | E | 15         |
| 09  | Moskva         | 55          | 50 | N | 37          | 37 | E | 156        |
| 10  | Koebenhavn     | 55          | 41 | N | 12          | 32 | E | 7          |
| 11  | Omsk           | 55          | 01 | N | 73          | 23 | E | 122        |
| 12  | Edmonton       | 53          | 34 | N | 113         | 31 | W | 671        |
| 13  | Dublin         | 53          | 26 | N | 06          | 15 | W | 68         |
| 14  | Berlin         | 52          | 28 | N | 13          | 24 | E | 48         |
| 15  | Irkutsk        | 52          | 16 | N | 104         | 19 | E | 469        |
| 16  | Warszawa       | 52          | 09 | N | 20          | 57 | E | 106        |
| 17  | De Bilt        | 52          | 05 | N | 05          | 10 | E | 1          |
| 18  | London         | 51          | 28 | N | 00          | 27 | W | 24         |
| 19  | Kiev           | 50          | 24 | N | 30          | 34 | E | 166        |
| 20  | Praha          | 50          | 06 | N | 14          | 15 | E | 380        |
| 21  | Winnipeg       | 49          | 55 | N | 97          | 14 | W | 238        |
| 22  | Luxembourg     | 49          | 37 | N | 06          | 13 | E | 376        |
| 23  | Vancouver      | 49          | 11 | N | 123         | 10 | W | 4          |
| 24  | Muenchen       | 48          | 21 | N | 11          | 48 | E | 443        |
| 25  | Wien           | 48          | 14 | N | 16          | 21 | W | 198        |
| 26  | Budapest       | 47          | 26 | N | 19          | 11 | E | 138        |
| 27  | Zuerich        | 47          | 22 | N | 08          | 33 | E | 555        |
| 28  | Lyon           | 45          | 43 | N | 04          | 56 | E | 197        |
| 29  | Montreal       | 45          | 28 | N | 73          | 45 | W | 35         |
| 30  | Beograd        | 44          | 48 | N | 20          | 28 | E | 132        |

|    |               |    |    |   |     |    |   |      |
|----|---------------|----|----|---|-----|----|---|------|
| 31 | Bucuresti     | 44 | 30 | N | 26  | 04 | E | 90   |
| 32 | Chang-chun    | 43 | 54 | N | 125 | 13 | E | 238  |
| 33 | Urumchi       | 43 | 47 | N | 87  | 39 | E | 936  |
| 34 | Vladivostok   | 43 | 07 | N | 131 | 56 | E | 183  |
| 35 | Sapporo       | 43 | 04 | N | 141 | 20 | E | 17   |
| 36 | Sofia         | 42 | 39 | N | 23  | 23 | E | 595  |
| 37 | Boston        | 42 | 22 | N | 71  | 02 | W | 6    |
| 38 | Chicago       | 41 | 59 | N | 87  | 54 | W | 203  |
| 39 | Shenyang      | 41 | 44 | N | 123 | 31 | E | 49   |
| 40 | Tashkent      | 41 | 20 | N | 69  | 18 | E | 488  |
| 41 | Barcelona     | 41 | 17 | N | 02  | 04 | E | 4    |
| 42 | Istanbul      | 40 | 54 | N | 29  | 09 | E | 18   |
| 43 | New York      | 40 | 46 | N | 73  | 54 | W | 7    |
| 44 | Madrid        | 40 | 24 | N | 03  | 40 | W | 667  |
| 45 | Ankara        | 39 | 57 | N | 32  | 53 | E | 891  |
| 46 | Denver        | 39 | 46 | N | 104 | 52 | W | 1611 |
| 47 | Kashgar       | 39 | 28 | N | 75  | 59 | E | 1291 |
| 48 | Dalian        | 38 | 54 | N | 121 | 38 | E | 97   |
| 49 | Washington    | 38 | 51 | N | 77  | 02 | W | 5    |
| 50 | Lisboa        | 38 | 43 | N | 09  | 09 | W | 77   |
| 51 | Ashgabat      | 37 | 55 | N | 58  | 08 | E | 312  |
| 52 | Athina        | 37 | 44 | N | 23  | 44 | E | 28   |
| 53 | San Francisco | 37 | 37 | N | 122 | 23 | W | 6    |
| 54 | Tunis         | 36 | 50 | N | 10  | 14 | E | 4    |
| 55 | Dar-El-Beida  | 36 | 41 | N | 03  | 13 | E | 25   |
| 56 | Gibraltar     | 36 | 09 | N | 05  | 20 | W | 5    |
| 57 | Las Vegas     | 36 | 05 | N | 115 | 10 | W | 662  |
| 58 | Tehran        | 35 | 41 | N | 51  | 19 | E | 1204 |
| 59 | Tokyo         | 35 | 41 | N | 139 | 46 | E | 6    |
| 60 | Osaka         | 34 | 41 | N | 135 | 31 | E | 23   |
| 61 | Peshawar      | 34 | 01 | N | 71  | 35 | E | 359  |
| 62 | Atlanta       | 33 | 39 | N | 84  | 25 | W | 312  |
| 63 | Fukuoka       | 33 | 35 | N | 130 | 23 | E | 3    |
| 64 | Damascus      | 33 | 25 | N | 36  | 31 | E | 608  |
| 65 | Amman         | 31 | 59 | N | 35  | 59 | E | 778  |
| 66 | Shanghai      | 31 | 25 | N | 121 | 27 | E | 9    |

|    |                       |    |    |   |     |    |   |      |
|----|-----------------------|----|----|---|-----|----|---|------|
| 67 | Wu h a n              | 30 | 36 | N | 114 | 03 | E | 24   |
| 68 | C a i r o             | 30 | 06 | N | 31  | 24 | E | 116  |
| 69 | New O r l e a n s     | 29 | 59 | N | 90  | 15 | W | 1    |
| 70 | L h a s a             | 29 | 40 | N | 91  | 08 | E | 3650 |
| 71 | New D e l h i         | 28 | 35 | N | 77  | 12 | E | 211  |
| 72 | N a z e               | 28 | 23 | N | 129 | 30 | E | 3    |
| 73 | M i a m i             | 25 | 45 | N | 80  | 23 | W | 4    |
| 74 | T a i p e i           | 25 | 02 | N | 121 | 31 | E | 9    |
| 75 | Kunming               | 25 | 01 | N | 102 | 41 | E | 1892 |
| 76 | K a r a c h i         | 24 | 54 | N | 67  | 08 | E | 21   |
| 77 | R i y a d h           | 24 | 42 | N | 46  | 44 | E | 635  |
| 78 | A s s w a n           | 23 | 57 | N | 32  | 49 | E | 201  |
| 79 | K o l k a t a         | 22 | 32 | N | 88  | 20 | E | 6    |
| 80 | H o n g K o n g       | 22 | 18 | N | 114 | 10 | E | 31   |
| 81 | H o n o l u l u       | 21 | 21 | N | 157 | 56 | W | 2    |
| 82 | B o m b a y           | 18 | 54 | N | 72  | 49 | E | 9    |
| 83 | K i n g s t o n       | 17 | 56 | N | 76  | 47 | W | 3    |
| 84 | Y a n g o n           | 16 | 46 | N | 96  | 10 | E | 14   |
| 85 | K h a r t o u m       | 15 | 36 | N | 32  | 33 | E | 382  |
| 86 | D a k a r             | 14 | 43 | N | 17  | 30 | W | 24   |
| 87 | B a n g k o k         | 13 | 43 | N | 100 | 33 | E | 3    |
| 88 | N i a m e y           | 13 | 29 | N | 02  | 10 | E | 223  |
| 89 | G u a m               | 13 | 28 | N | 144 | 47 | E | 75   |
| 90 | B a m a k o           | 12 | 32 | N | 07  | 57 | W | 380  |
| 91 | N d j a m e n a       | 12 | 08 | N | 15  | 02 | E | 295  |
| 92 | D j i b o u t i       | 11 | 33 | N | 43  | 09 | E | 13   |
| 93 | A d d i s A b a b a   | 09 | 02 | N | 38  | 45 | E | 2354 |
| 94 | C o l o m b o         | 06 | 54 | N | 79  | 52 | E | 7    |
| 95 | B o g o t a           | 04 | 42 | N | 74  | 09 | W | 2547 |
| 96 | K u a l a L u m p u r | 03 | 07 | N | 101 | 33 | E | 27   |
| 97 | S i n g a p o r e     | 01 | 22 | N | 103 | 59 | E | 5    |

---

**Table S2.** Stations on the Southern Hemisphere [34].

| No. | S t a t i o n           | Lat. ( ° ' ) |    |   | Lon. ( ° ' ) |    |   | Height (m) |
|-----|-------------------------|--------------|----|---|--------------|----|---|------------|
| 01  | U s h u a i a           | 54           | 48 | S | 68           | 19 | W | 28         |
| 02  | C h r i s t c h u r c h | 43           | 29 | S | 172          | 33 | E | 38         |
| 03  | M e l b o u r n e       | 37           | 39 | S | 144          | 49 | E | 132        |
| 04  | A u c k l a n d         | 37           | 01 | S | 174          | 48 | E | 7          |
| 05  | C a n b e r r a         | 35           | 18 | S | 149          | 12 | E | 575        |
| 06  | B u e n o s A i r e s   | 34           | 35 | S | 58           | 29 | W | 25         |
| 07  | C a p e T o w n         | 33           | 58 | S | 18           | 36 | E | 46         |
| 08  | S y d n e y             | 33           | 56 | S | 151          | 10 | E | 6          |
| 09  | P e r t h               | 31           | 55 | S | 115          | 58 | E | 20         |
| 10  | M a p u t o             | 25           | 55 | S | 32           | 34 | E | 39         |
| 11  | P r e t o r i a         | 25           | 44 | S | 28           | 11 | E | 1308       |
| 12  | R i o D e J a n e i r o | 22           | 55 | S | 43           | 10 | W | 5          |
| 13  | L a P a z               | 16           | 31 | S | 68           | 11 | W | 4058       |
| 14  | S a l v a d o r         | 13           | 01 | S | 38           | 31 | W | 52         |
| 15  | L i m a                 | 12           | 01 | S | 77           | 07 | W | 12         |
| 16  | H o n i a r a           | 09           | 25 | S | 160          | 03 | E | 8          |
| 17  | D a r E s S a l a a m   | 06           | 52 | S | 39           | 12 | E | 55         |
| 18  | M a n a u s             | 03           | 08 | S | 60           | 01 | W | 72         |
| 19  | N a i r o b i           | 01           | 19 | S | 36           | 54 | E | 1624       |

**Table S3.** Observational stations in Japan [34].

| No. | S t a t i o n       | Lat. (° ' ) |     |   | Lon. (° ' ) |     |   | Height (m) |
|-----|---------------------|-------------|-----|---|-------------|-----|---|------------|
| 0 1 | W a k k a n a i     | 4 5         | 2 5 | N | 1 4 1       | 4 1 | E | 3          |
| 0 2 | A b a s h i r i     | 4 4         | 0 1 | N | 1 4 4       | 1 7 | E | 3 8        |
| 0 3 | A s a h i k a w a   | 4 3         | 4 6 | N | 1 4 2       | 2 2 | E | 1 2 0      |
| 0 4 | N e m u r o         | 4 3         | 2 0 | N | 1 4 5       | 3 5 | E | 2 5        |
| 0 5 | S a p p o r o       | 4 3         | 0 4 | N | 1 4 1       | 2 0 | E | 1 7        |
| 0 6 | K u s h i r o       | 4 2         | 5 9 | N | 1 4 4       | 2 3 | E | 5          |
| 0 7 | O b i h i r o       | 4 2         | 5 5 | N | 1 4 3       | 1 3 | E | 3 8        |
| 0 8 | S u t t s u         | 4 2         | 4 8 | N | 1 4 0       | 1 3 | E | 3 3        |
| 0 9 | U r a k a w a       | 4 2         | 1 0 | N | 1 4 2       | 4 7 | E | 3 7        |
| 1 0 | H a k o d a t e     | 4 1         | 4 9 | N | 1 4 0       | 4 5 | E | 3 5        |
| 1 1 | A o m o r i         | 4 0         | 4 9 | N | 1 4 0       | 4 6 | E | 3          |
| 1 2 | A k i t a           | 3 9         | 4 3 | N | 1 4 0       | 0 6 | E | 6          |
| 1 3 | M o r i o k a       | 3 9         | 4 2 | N | 1 4 1       | 1 0 | E | 1 5 5      |
| 1 4 | M i y a k o         | 3 9         | 3 9 | N | 1 4 1       | 5 8 | E | 4 3        |
| 1 5 | S a k a t a         | 3 8         | 5 5 | N | 1 3 9       | 5 1 | E | 3          |
| 1 6 | S e n d a i         | 3 8         | 1 6 | N | 1 4 0       | 5 4 | E | 3 9        |
| 1 7 | Y a m a g a t a     | 3 8         | 1 5 | N | 1 4 0       | 2 1 | E | 1 5 3      |
| 1 8 | A i k a w a         | 3 8         | 0 2 | N | 1 3 8       | 1 4 | E | 6          |
| 1 9 | N i g a t a         | 3 7         | 5 4 | N | 1 3 9       | 0 1 | E | 4          |
| 2 0 | F u k u s h i m a   | 3 7         | 4 6 | N | 1 4 0       | 2 8 | E | 6 7        |
| 2 1 | W a j i m a         | 3 7         | 2 3 | N | 1 3 6       | 5 4 | E | 5          |
| 2 2 | T a k a d a         | 3 7         | 0 6 | N | 1 3 8       | 1 5 | E | 1 3        |
| 2 3 | O n a h a m a       | 3 6         | 5 7 | N | 1 4 0       | 5 4 | E | 3          |
| 2 4 | T o y a m a         | 3 6         | 4 3 | N | 1 3 7       | 1 2 | E | 9          |
| 2 5 | N a g a n o         | 3 6         | 4 0 | N | 1 3 8       | 1 2 | E | 4 1 8      |
| 2 6 | K a n a z a w a     | 3 6         | 3 5 | N | 1 3 6       | 3 8 | E | 6          |
| 2 7 | U t s u m o m i y a | 3 6         | 3 3 | N | 1 3 9       | 5 2 | E | 1 1 9      |
| 2 8 | M a e b a s h i     | 3 6         | 2 4 | N | 1 3 9       | 2 3 | E | 1 1 2      |
| 2 9 | M i t o             | 3 6         | 2 3 | N | 1 4 0       | 2 8 | E | 2 9        |
| 3 0 | K a r u i z a w a   | 3 6         | 2 1 | N | 1 3 8       | 3 3 | E | 9 9 9      |
| 3 1 | M a t s u m o t o   | 3 6         | 1 5 | N | 1 3 7       | 5 8 | E | 6 1 0      |
| 3 2 | S a i g o           | 3 6         | 1 2 | N | 1 3 3       | 2 0 | E | 2 7        |

|    |              |    |    |   |     |    |   |     |
|----|--------------|----|----|---|-----|----|---|-----|
| 33 | Kumagaya     | 36 | 09 | N | 139 | 23 | E | 30  |
| 34 | Takayama     | 36 | 09 | N | 137 | 15 | E | 560 |
| 35 | Fukui        | 36 | 03 | N | 136 | 13 | E | 9   |
| 36 | Choshi       | 35 | 44 | N | 140 | 51 | E | 20  |
| 37 | Tokyo        | 35 | 41 | N | 139 | 46 | E | 6   |
| 38 | Kofu         | 35 | 40 | N | 138 | 33 | E | 273 |
| 39 | Tsuruga      | 35 | 39 | N | 136 | 04 | E | 2   |
| 40 | Ida          | 35 | 31 | N | 137 | 49 | E | 516 |
| 41 | Tottori      | 35 | 29 | N | 134 | 14 | E | 7   |
| 42 | Yokohama     | 35 | 26 | N | 139 | 39 | E | 39  |
| 43 | Gifu         | 35 | 24 | N | 136 | 46 | E | 13  |
| 44 | Hikone       | 35 | 17 | N | 136 | 15 | E | 87  |
| 45 | Nagoya       | 35 | 10 | N | 136 | 58 | E | 51  |
| 46 | Kyoto        | 35 | 01 | N | 135 | 44 | E | 41  |
| 47 | Shizuoka     | 34 | 59 | N | 138 | 24 | E | 14  |
| 48 | Hamada       | 34 | 54 | N | 132 | 04 | E | 19  |
| 49 | Oshima       | 34 | 45 | N | 139 | 22 | E | 74  |
| 50 | Hamamatsu    | 34 | 45 | N | 137 | 43 | E | 46  |
| 51 | Tsu          | 34 | 44 | N | 136 | 31 | E | 3   |
| 52 | Kobe         | 34 | 42 | N | 135 | 13 | E | 5   |
| 53 | Osaka        | 34 | 41 | N | 135 | 31 | E | 23  |
| 54 | Okayama      | 34 | 40 | N | 133 | 55 | E | 3   |
| 55 | Hiroshima    | 34 | 24 | N | 132 | 28 | E | 4   |
| 56 | Takamatsu    | 34 | 19 | N | 134 | 03 | E | 9   |
| 57 | Wakayama     | 34 | 14 | N | 135 | 10 | E | 14  |
| 58 | Izuhara      | 34 | 12 | N | 129 | 18 | E | 4   |
| 59 | Owase        | 34 | 04 | N | 136 | 12 | E | 15  |
| 60 | Tokushima    | 34 | 04 | N | 134 | 34 | E | 2   |
| 61 | Shimonoseki  | 33 | 57 | N | 130 | 56 | E | 3   |
| 62 | Matsuyama    | 33 | 51 | N | 132 | 47 | E | 32  |
| 63 | Fukuoka      | 33 | 35 | N | 130 | 23 | E | 3   |
| 64 | Kochi        | 33 | 34 | N | 133 | 33 | E | 1   |
| 65 | Ushiomisaki  | 33 | 27 | N | 135 | 45 | E | 68  |
| 66 | Saga         | 33 | 16 | N | 130 | 18 | E | 6   |
| 67 | Murotomisaki | 33 | 15 | N | 134 | 11 | E | 185 |
| 68 | Oita         | 33 | 14 | N | 131 | 37 | E | 5   |

|     |                       |     |     |   |       |     |   |       |
|-----|-----------------------|-----|-----|---|-------|-----|---|-------|
| 6 9 | H a c h i j o j i m a | 3 3 | 0 7 | N | 1 3 9 | 4 7 | E | 1 5 1 |
| 7 0 | K u m a m o t o       | 3 2 | 4 9 | N | 1 3 0 | 4 2 | E | 3 8   |
| 7 1 | N a g a s a k i       | 3 2 | 4 4 | N | 1 2 9 | 5 2 | E | 2 7   |
| 7 2 | S h i m i z u         | 3 2 | 4 3 | N | 1 3 3 | 0 1 | E | 3 1   |
| 7 3 | M i y a z a k i       | 3 1 | 5 6 | N | 1 3 1 | 2 5 | E | 9     |
| 7 4 | K a g o s h i m a     | 3 1 | 3 3 | N | 1 3 0 | 3 3 | E | 4     |
| 7 5 | N a z e               | 2 8 | 2 3 | N | 1 2 9 | 3 0 | E | 3     |

---
